# Supplementary material for: On the Fragmentation of Ni(II) β-Diketonate- Diamine Complexes as Molecular Precursors for NiO Films: A Theoretical and Experimental Investigation
Source: Preprints.org preprint supplement (doi:10.20944/preprints202312.1647.v1), 2023-12-21
Supplement: Supplementary file 1 [file supplementary]

## Supporting Material

# On the fragmentation of Ni(II) $\beta$ -diketonate-diamine complexes as molecular precursors for NiO films: a theoretical and experimental investigation

Cristiano Invernizzi <sup>1</sup>, Gloria Tabacchi <sup>1,\*</sup>, Roberta Seraglia <sup>2</sup>, Chiara Maccato <sup>2,3</sup>, Mattia Benedet <sup>2,3</sup>, Marco Roverso <sup>2,3</sup>, Sara Bogialli <sup>2,3</sup>, Davide Barreca <sup>2,\*</sup> and Ettore Fois <sup>1</sup>

<sup>1</sup> Department of Science and High Technology - Insubria University and INSTM, 22100 Como, Italy; [cinvernizzi@uninsubria.it](mailto:cinvernizzi@uninsubria.it) (C.I.); [gloria.tabacchi@uninsubria.it](mailto:gloria.tabacchi@uninsubria.it) (G.T.); [ettore.fois@uninsubria.it](mailto:ettore.fois@uninsubria.it) (E.F.)

<sup>2</sup> CNR-ICMATE and INSTM, Department of Chemical Sciences, Padova University, 35131 Padova, Italy; [roberta.sergalia@cnr.it](mailto:roberta.sergalia@cnr.it) (R.S.); [davide.barreca@unipd.it](mailto:davide.barreca@unipd.it) (D.B.)

<sup>3</sup> Department of Chemical Sciences, Padova University and INSTM, 35131 Padova, Italy; [chiara.maccato@unipd.it](mailto:chiara.maccato@unipd.it) (C.M.); [mattia.benedet@phd.unipd.it](mailto:mattia.benedet@phd.unipd.it) (M.B.); [marco.roverso@unipd.it](mailto:marco.roverso@unipd.it) (M.R.); [sara.bogialli@unipd.it](mailto:sara.bogialli@unipd.it) (S.B.)

\* Correspondence: [gloria.tabacchi@uninsubria.it](mailto:gloria.tabacchi@uninsubria.it) (G.T.); [davide.barreca@unipd.it](mailto:davide.barreca@unipd.it) (D.B.)

## § S1 Optimized structures of species detected in mass spectrometry experiments

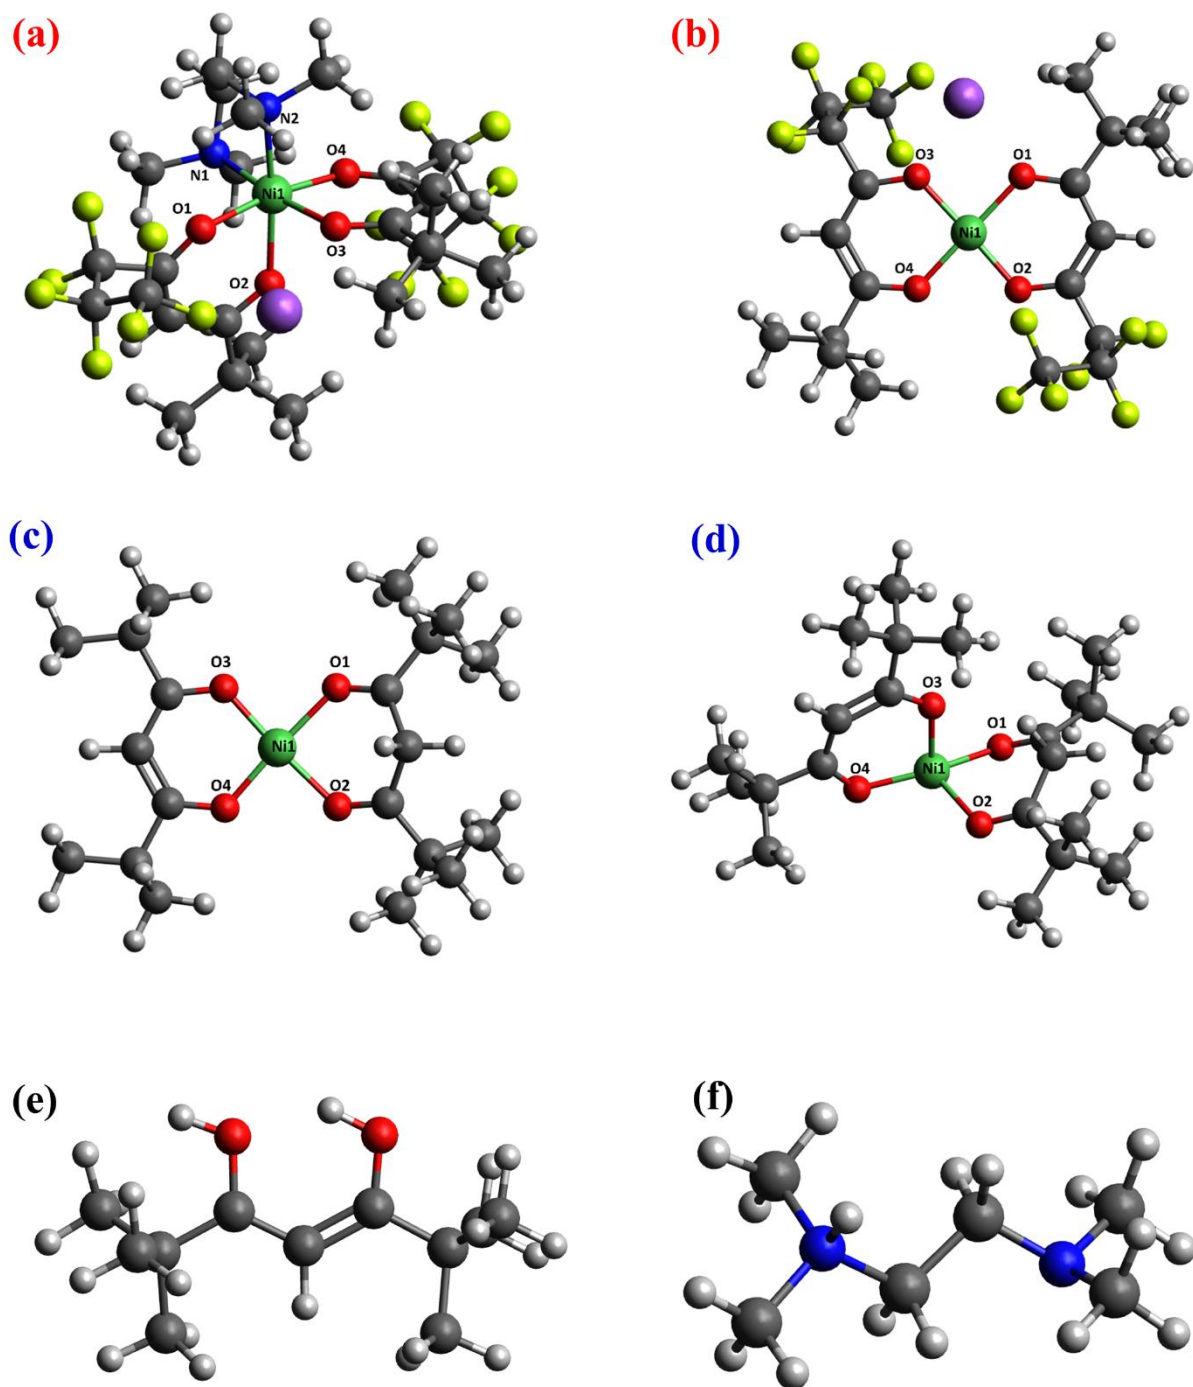

**Figure S1.** Graphical representation of the optimized structures of: (a)  $[M+Na]^+ = [Ni(fod)_2TMEDA+Na]^+$ , (triplet state); (b)  $[M-TMEDA+Na]^+ = [Ni(fod)_2+Na]^+$ , obtained by loss of TMEDA and addition of  $Na^+$  from complex **2**; (c) and (d)  $[M-TMEDA+H]^+ = [Ni(thd)_2+H]^+$  pseudo-planar geometry (singlet state) and distorted tetrahedral geometry (triplet state), respectively. The second one is  $0.32 \text{ kcal}\cdot\text{mol}^{-1}$  lower in energy with respect to (d); (e)  $[HL+H]^+ = [thd+H]^+$  obtained by addition of  $H^+$  to thd ligand; (f)  $[TMEDA+H]^+$  obtained by addition of  $H^+$  to neutral TMEDA. Color codes: purple = Na; green = Ni; yellow = F; blue = N; red = O; grey = C; white = H.

| Bond Lengths (Å) | [M+Na] <sup>+</sup> (a) | [M-TMEDA+Na] <sup>+</sup> (b) | [M-TMEDA+H] <sup>+</sup> (c) | [M-TMEDA+H] <sup>+</sup> (d) |
|------------------|-------------------------|-------------------------------|------------------------------|------------------------------|
| <i>Ni-O1</i>     | 2.080                   | 1.876                         | 1.897                        | 1.986                        |
| <i>Ni-O2</i>     | 2.112                   | 1.822                         | 1.897                        | 1.981                        |
| <i>Ni-O3</i>     | 2.098                   | 1.847                         | 1.793                        | 1.901                        |
| <i>Ni-O4</i>     | 1.989                   | 1.837                         | 1.793                        | 1.842                        |
| <i>Ni-N1</i>     | 2.152                   | -                             | -                            | -                            |
| <i>Ni-N2</i>     | 2.126                   | -                             | -                            | -                            |
| <i>Na-O1</i>     | 2.502                   | 2.389                         |                              |                              |
| <i>Na-O2</i>     | 2.532                   | -                             |                              |                              |
| <i>Na-O3</i>     | 2.215                   | 2.240                         |                              |                              |
| <i>Na-F</i>      | 2.441                   | 2.542; 2.470                  |                              |                              |

**Table S1.** Ni-O and Ni-N bond distances of the species reported in Figure S1, i.e: (a) [M+Na]<sup>+</sup> = [Ni(fod)<sub>2</sub>TMEDA+Na]<sup>+</sup>, (triplet state); (b) [M-TMEDA+Na]<sup>+</sup> = [Ni(fod)<sub>2</sub>+Na]<sup>+</sup>, obtained from complex **2** by TMEDA loss and Na<sup>+</sup> addition; (c)-(d), [M-TMEDA+H]<sup>+</sup> = [Ni(thd)<sub>2</sub>+H]<sup>+</sup> pseudo-planar geometry (singlet state) and distorted tetrahedral geometry (triplet state), respectively.

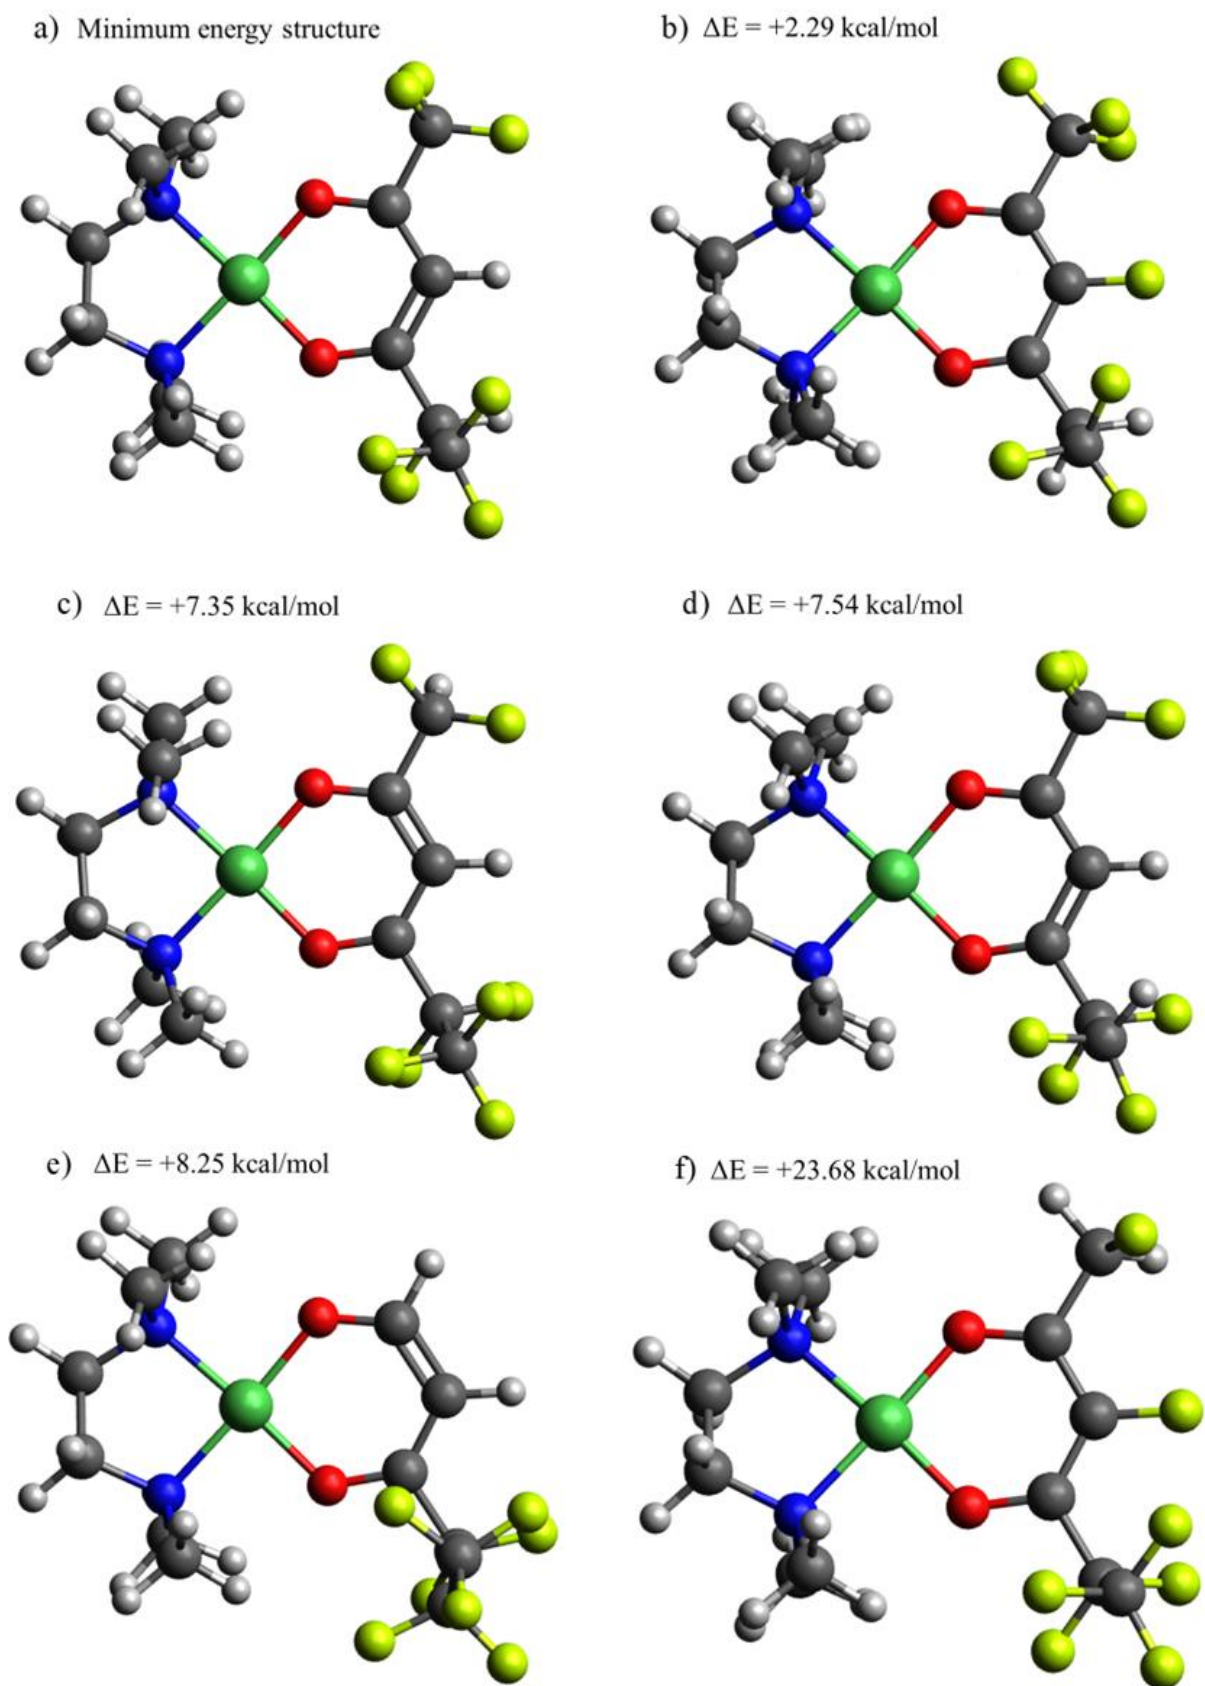

**Figure S2.** Graphical representation of six possible structures of fragment ion  $[\text{Ni}(\text{fod})\text{TMEDA}]^+-(\text{CH}_3)_2\text{C}=\text{CH}_2$ , derived from an additional rearrangement of fod ligand and detected in  $\text{MS}^2$  spectra of precursor 2. Energy differences (relative energies) with respect to the minimum energy structure (a) are reported on the top of each model geometry. Color codes as in Figure S1.

## § S2. NBO analysis

| Fragment                        | NBO type         | Bond         | Occupancy | % Ni | % X |
|---------------------------------|------------------|--------------|-----------|------|-----|
| <b>Ni(tfa)TMEDA<sup>+</sup></b> |                  |              |           |      |     |
|                                 | BD ( $\sigma$ )  | <i>Ni-O2</i> | 1.909     | 11   | 89  |
|                                 | BD ( $\sigma$ )  | <i>Ni-O1</i> | 1.904     | 11   | 89  |
|                                 | BD ( $\sigma$ )  | <i>Ni-N1</i> | 1.866     | 12   | 88  |
|                                 | BD ( $\sigma$ )  | <i>Ni-N2</i> | 1.868     | 12   | 88  |
|                                 |                  |              |           |      |     |
|                                 | BD* ( $\sigma$ ) | <i>Ni-O2</i> | 0.100     | 89   | 11  |
|                                 | BD* ( $\sigma$ ) | <i>Ni-O1</i> | 0.102     | 89   | 11  |
|                                 | BD* ( $\sigma$ ) | <i>Ni-N1</i> | 0.128     | 88   | 12  |
|                                 | BD* ( $\sigma$ ) | <i>Ni-N2</i> | 0.128     | 88   | 12  |
|                                 |                  |              |           |      |     |
| <b>Ni(fod)TMEDA<sup>+</sup></b> |                  |              |           |      |     |
|                                 | BD ( $\sigma$ )  | <i>Ni-O2</i> | 1.903     | 11   | 89  |
|                                 | BD ( $\sigma$ )  | <i>Ni-O1</i> | 1.897     | 11   | 89  |
|                                 | BD ( $\sigma$ )  | <i>Ni-N1</i> | 1.861     | 11   | 89  |
|                                 | BD ( $\sigma$ )  | <i>Ni-N2</i> | 1.863     | 11   | 89  |
|                                 |                  |              |           |      |     |
|                                 | BD* ( $\sigma$ ) | <i>Ni-O2</i> | 0.111     | 89   | 11  |
|                                 | BD* ( $\sigma$ ) | <i>Ni-O1</i> | 0.112     | 89   | 11  |
|                                 | BD* ( $\sigma$ ) | <i>Ni-N1</i> | 0.132     | 89   | 11  |
|                                 | BD* ( $\sigma$ ) | <i>Ni-N2</i> | 0.133     | 89   | 11  |
|                                 |                  |              |           |      |     |
| <b>Ni(thd)TMEDA<sup>+</sup></b> |                  |              |           |      |     |
|                                 | BD ( $\sigma$ )  | <i>Ni-O2</i> | 1.896     | 11   | 89  |
|                                 | BD ( $\sigma$ )  | <i>Ni-O1</i> | 1.896     | 11   | 89  |
|                                 | BD ( $\sigma$ )  | <i>Ni-N1</i> | 1.866     | 10   | 90  |
|                                 | BD ( $\sigma$ )  | <i>Ni-N2</i> | 1.866     | 10   | 90  |
|                                 |                  |              |           |      |     |
|                                 | BD* ( $\sigma$ ) | <i>Ni-O2</i> | 0.110     | 89   | 11  |
|                                 | BD* ( $\sigma$ ) | <i>Ni-O1</i> | 0.110     | 89   | 11  |
|                                 | BD* ( $\sigma$ ) | <i>Ni-N1</i> | 0.137     | 90   | 10  |
|                                 | BD* ( $\sigma$ ) | <i>Ni-N2</i> | 0.137     | 90   | 10  |

**Table S2.** Natural bond orbital (NBO) analysis for [Ni(L)TMEDA]<sup>+</sup>, where L = tfa, fod, thd, reporting: NBO type, atoms on which NBOs are localized, NBO occupancy, and localization (%) of NBOs on the involved atoms. Legend: BD = bonding character; BD\* = anti-bonding character; X = O or N. Atoms labels as in Figure 3.

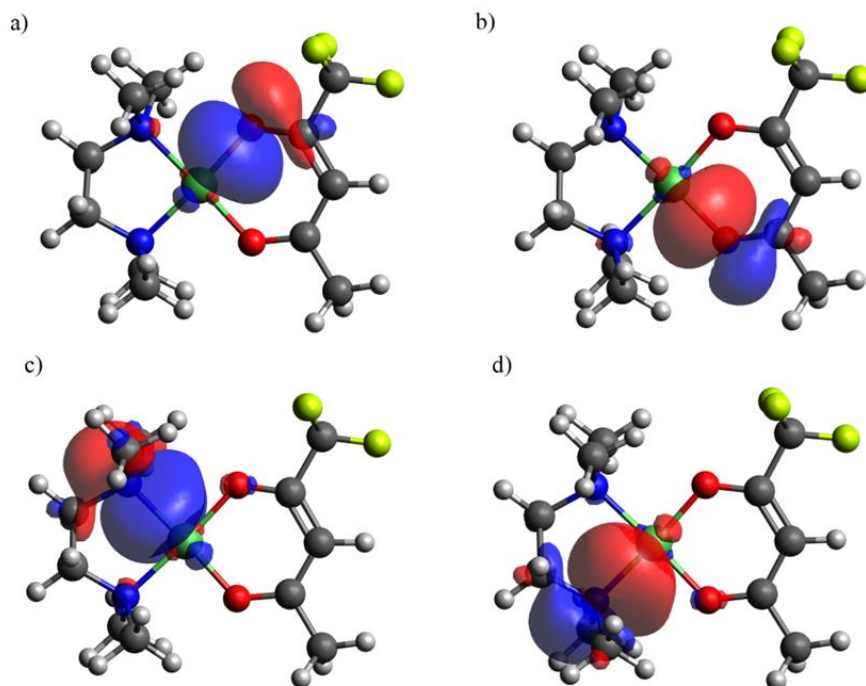

**Figure S3.** Graphical representation of natural bond orbitals of  $[\text{Ni}(\text{tfa})\text{TMEDA}]^+$  localized on the following bonds: a) Ni-O1 (BD); b) Ni-O2 (BD); c) Ni-N1 (BD); d) Ni-N2 (BD) (see also Table S2). Atom color codes: green = Ni; yellow = F; blue = N; red = O; grey = C; white = H.

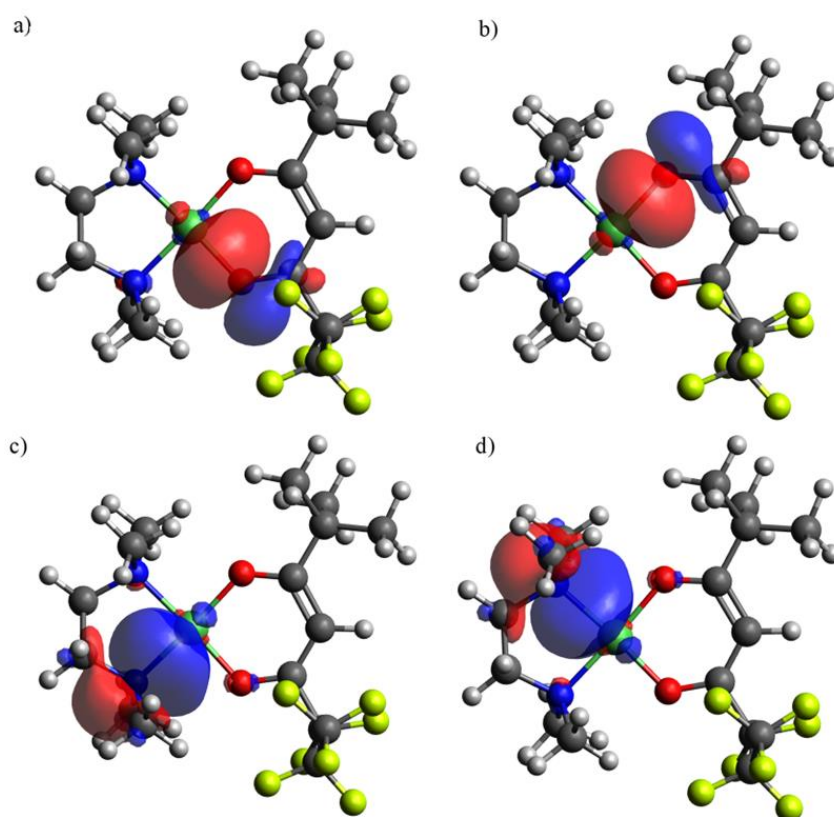

**Figure S4.** Graphical representation of natural bond orbitals of  $[\text{Ni}(\text{fod})\text{TMEDA}]^+$  localized on the following bonds: a) Ni-O1 (BD); b) Ni-O2 (BD); c) Ni-N1 (BD); d) Ni-N2 (BD) (see also Table S2). Atom color codes: green = Ni; yellow = F; blue = N; red = O; grey = C; white = H.

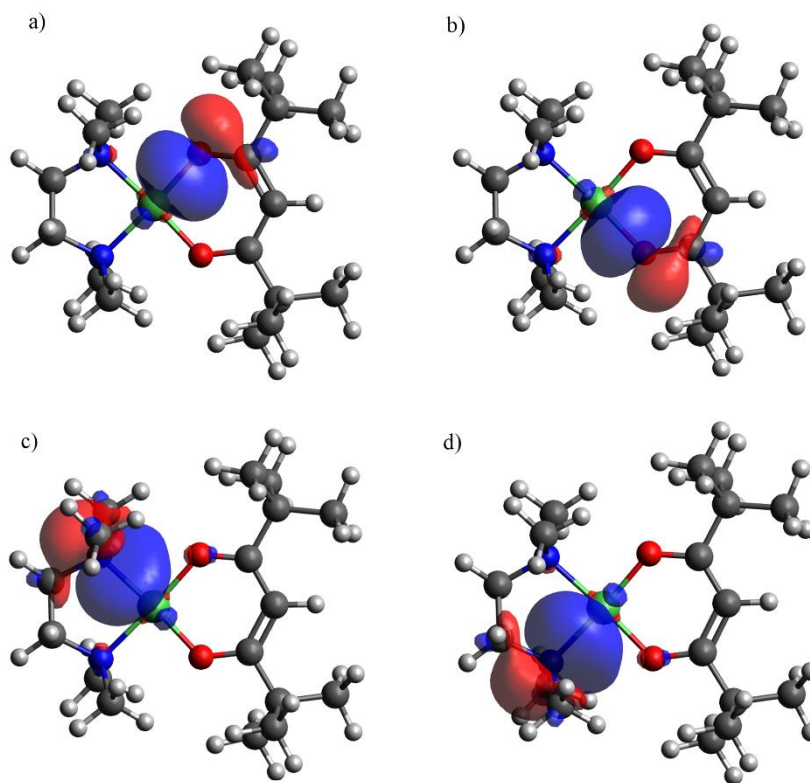

**Figure S5.** Graphical representation of natural bond orbitals of  $[\text{Ni}(\text{thd})\text{TMEDA}]^+$  localized on the following bonds: a) Ni-O1 (BD); b) Ni-O2 (BD); c) Ni-N1 (BD); d) Ni-N2 (BD) (see also Table S2). Atom color codes: green = Ni; blue = N; red = O; grey = C; white = H.

| Fragment                                                            | NBO type                                                            | Bond            | Occupancy | % Y | % X |
|---------------------------------------------------------------------|---------------------------------------------------------------------|-----------------|-----------|-----|-----|
| <b>Ni(tfa)TMEDA<sup>+</sup><br/>-NH(CH<sub>3</sub>)<sub>2</sub></b> |                                                                     |                 |           |     |     |
|                                                                     | BD ( $\pi$ )                                                        | <i>CHT-CH2T</i> | 1.985     | 52  | 48  |
|                                                                     | BD ( $\pi$ )                                                        | <i>CHT-CH2T</i> | 1.663     | 49  | 51  |
|                                                                     | BD ( $\sigma$ )                                                     | <i>Ni-N1</i>    | 1.878     | 26  | 74  |
|                                                                     | BD* ( $\pi$ )                                                       | <i>CHT-CH2T</i> | 0.011     | 48  | 52  |
|                                                                     | BD* ( $\pi$ )                                                       | <i>CHT-CH2T</i> | 0.187     | 51  | 49  |
| <b>Ni(fod)TMEDA<sup>+</sup><br/>-NH(CH<sub>3</sub>)<sub>2</sub></b> | BD* ( $\sigma$ )                                                    | <i>Ni-N1</i>    | 0.527     | 74  | 26  |
|                                                                     |                                                                     |                 |           |     |     |
|                                                                     | <b>Ni(fod)TMEDA<sup>+</sup><br/>-NH(CH<sub>3</sub>)<sub>2</sub></b> |                 |           |     |     |
|                                                                     | BD ( $\pi$ )                                                        | <i>CHT-CH2T</i> | 1.981     | 52  | 48  |
|                                                                     | LP ( $\pi$ )                                                        | <i>CH2T</i>     | 0.959     | -   | -   |
|                                                                     | BD ( $\sigma$ )                                                     | <i>CHT-N1</i>   | 1.749     | 22  | 78  |
| <b>Ni(thd)TMEDA<sup>+</sup><br/>-NH(CH<sub>3</sub>)<sub>2</sub></b> | BD* ( $\pi$ )                                                       | <i>CHT-CH2T</i> | 0.010     | 48  | 52  |
|                                                                     | BD* ( $\sigma$ )                                                    | <i>CHT-N1</i>   | 0.676     | 78  | 22  |
|                                                                     |                                                                     |                 |           |     |     |
|                                                                     | <b>Ni(thd)TMEDA<sup>+</sup><br/>-NH(CH<sub>3</sub>)<sub>2</sub></b> |                 |           |     |     |
|                                                                     | BD ( $\pi$ )                                                        | <i>CHT-CH2T</i> | 1.985     | 52  | 48  |
|                                                                     | BD ( $\pi$ )                                                        | <i>CHT-CH2T</i> | 1.691     | 49  | 51  |
| <b>Ni(thd)TMEDA<sup>+</sup><br/>-NH(CH<sub>3</sub>)<sub>2</sub></b> | BD ( $\sigma$ )                                                     | <i>Ni-N1</i>    | 1.871     | 24  | 76  |
|                                                                     | BD* ( $\pi$ )                                                       | <i>CHT-CH2T</i> | 0.011     | 48  | 52  |
|                                                                     | BD* ( $\pi$ )                                                       | <i>CHT-CH2T</i> | 0.198     | 51  | 49  |
|                                                                     | BD* ( $\sigma$ )                                                    | <i>Ni-N1</i>    | 0.548     | 76  | 24  |

**Table S3.** NBO analysis for [Ni(L)TMEDA]<sup>+</sup>-NH(CH<sub>3</sub>)<sub>2</sub>, where L = tfa, fod, thd. The table reports: NBO type, atoms on which NBOs are localized, NBOs occupancy and the percentage localization of NBOs on the involved atoms. Legend: BD = bonding; BD\* = anti-bonding; LP = lone-pair; Y = Ni or CHT; X = N1 or CH2T. Atoms labels as in Figure 4.

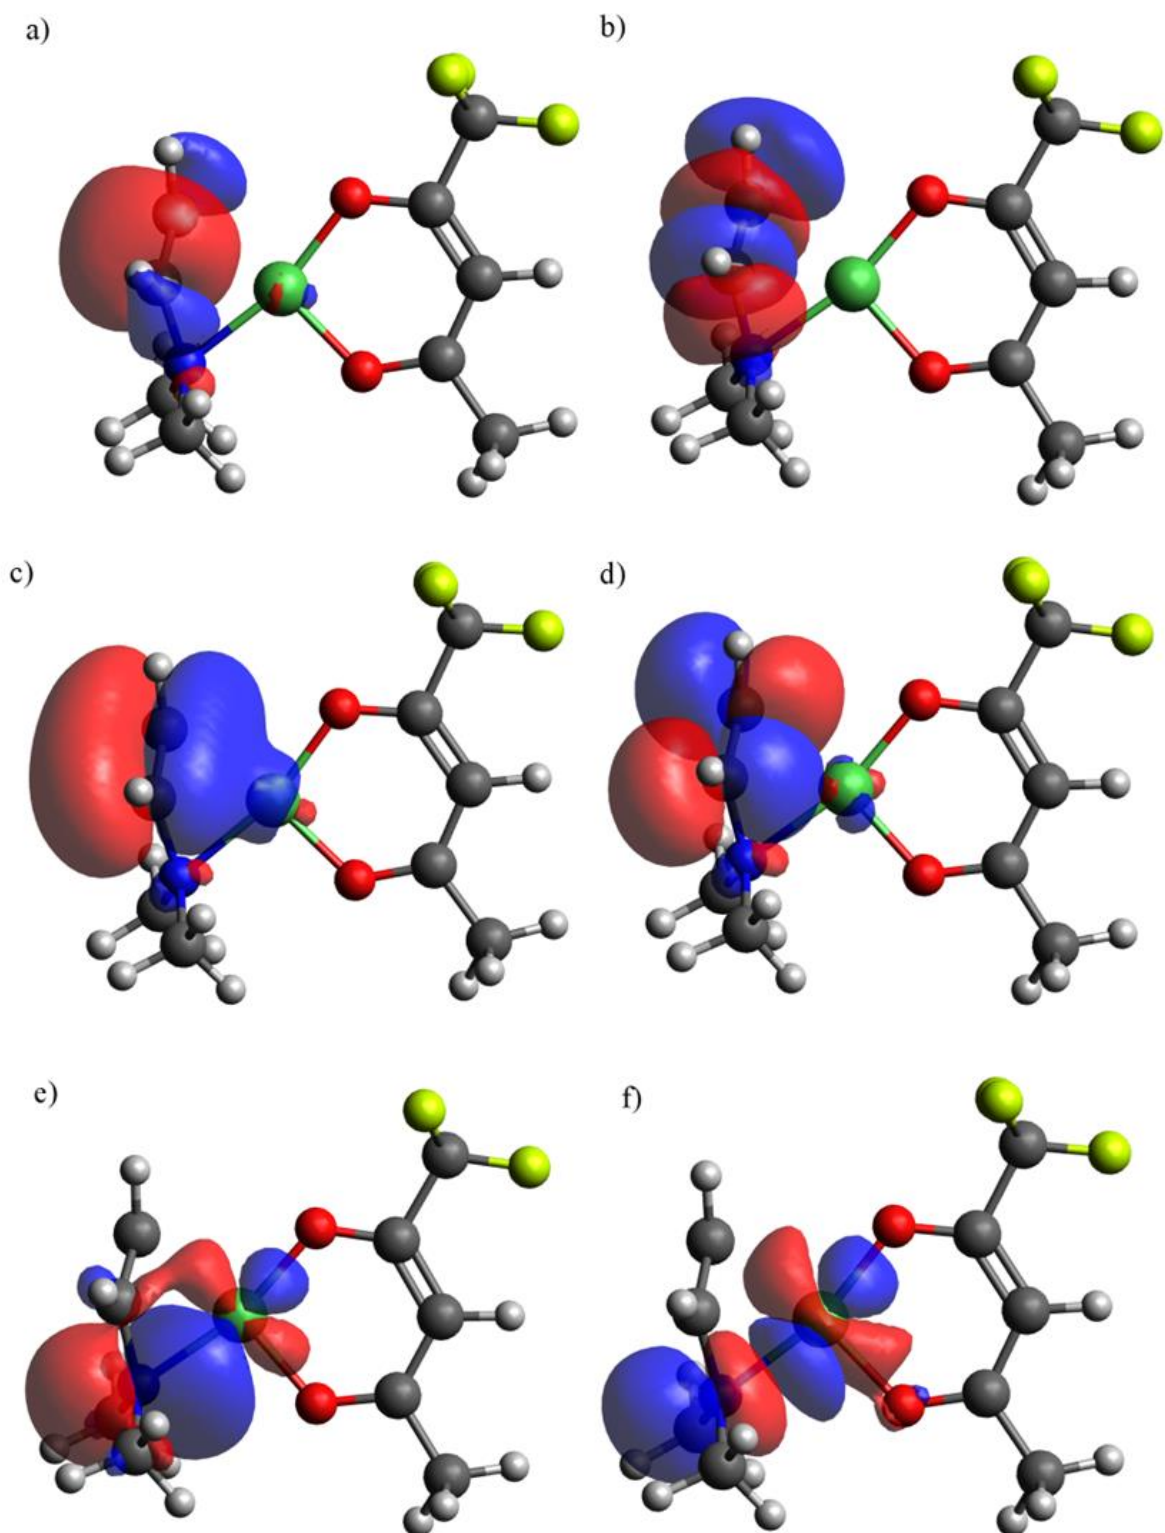

**Figure S6.** Graphical representation of natural bond orbitals of Ni(tfa)TMEDA<sup>+</sup>-NH(CH<sub>3</sub>)<sub>2</sub> localized on the following bonds: a) CHT-CH<sub>2</sub>T (BD); b) CHT-CH<sub>2</sub>T (BD\*); c) CHT-CH<sub>2</sub>T (BD); d) CHT-CH<sub>2</sub>T (BD\*); e) Ni-N1 (BD); f) Ni-N1 (BD\*) (see also Table S3). Atom color codes: green = Ni; yellow = F; blue = N; red = O; grey = C; white = H.

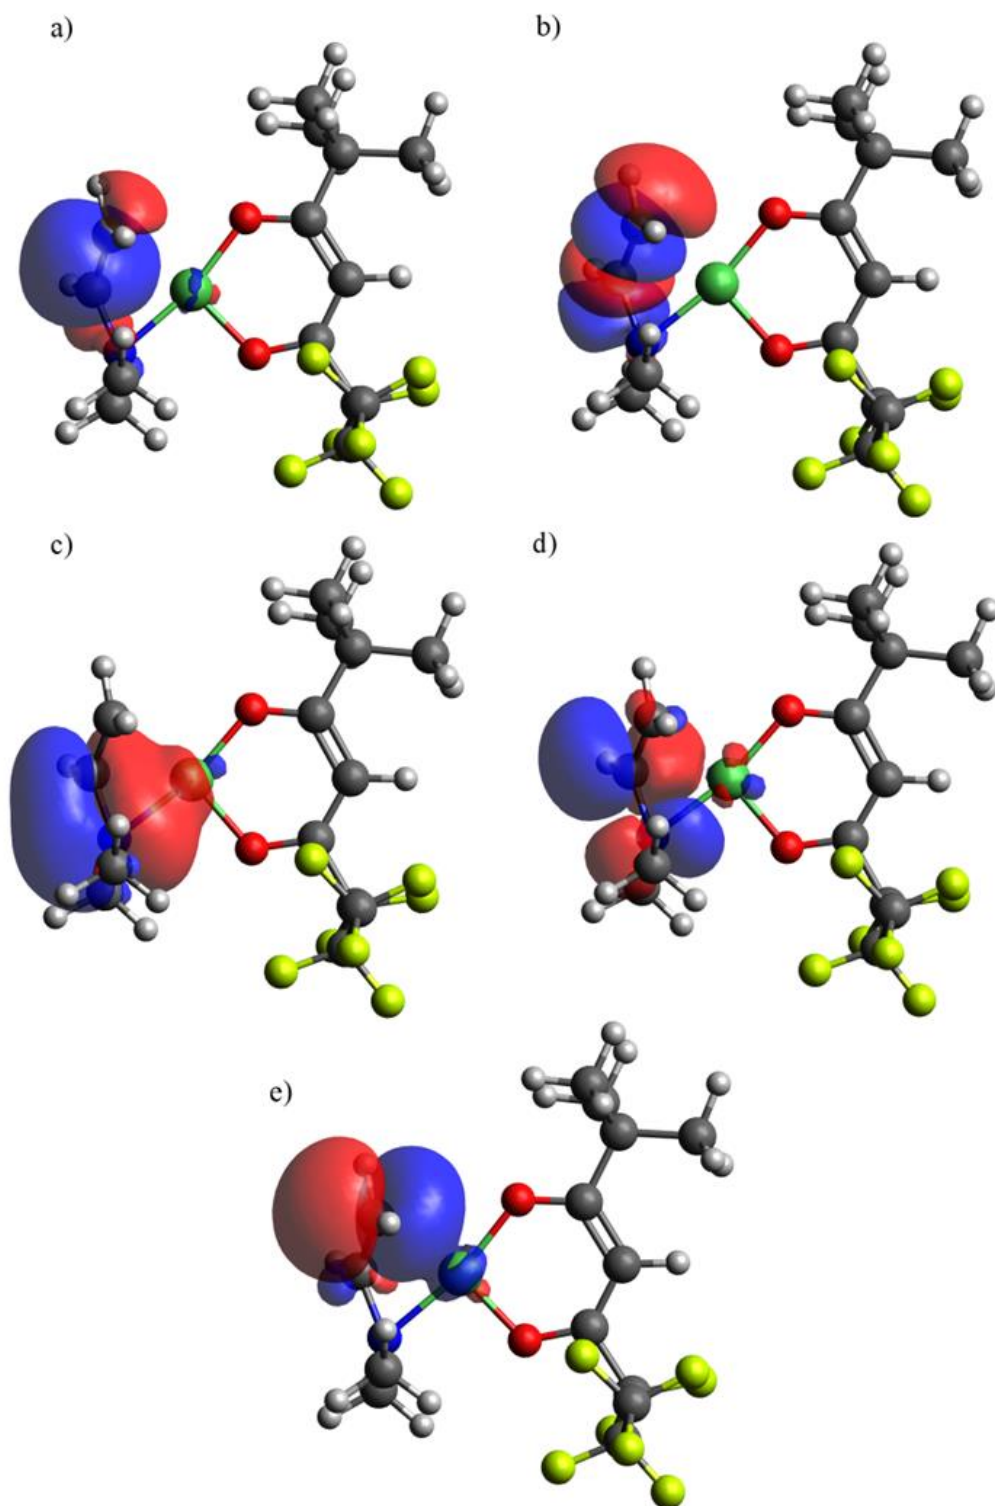

**Figure S7.** Graphical representation of natural bond orbitals of  $\text{Ni}(\text{fod})\text{TMEDA}^+\text{-NH}(\text{CH}_3)_2$  localized on the following bonds: a) CHT-CH<sub>2</sub>T (BD); b) CHT-CH<sub>2</sub>T (BD\*); c) Ni-N1 (BD); d) Ni-N1 (BD\*); e) CH<sub>2</sub>T (LP) (see also Table S3). Atom color codes: green = Ni; yellow = F; blue = N; red = O; grey = C; white = H.

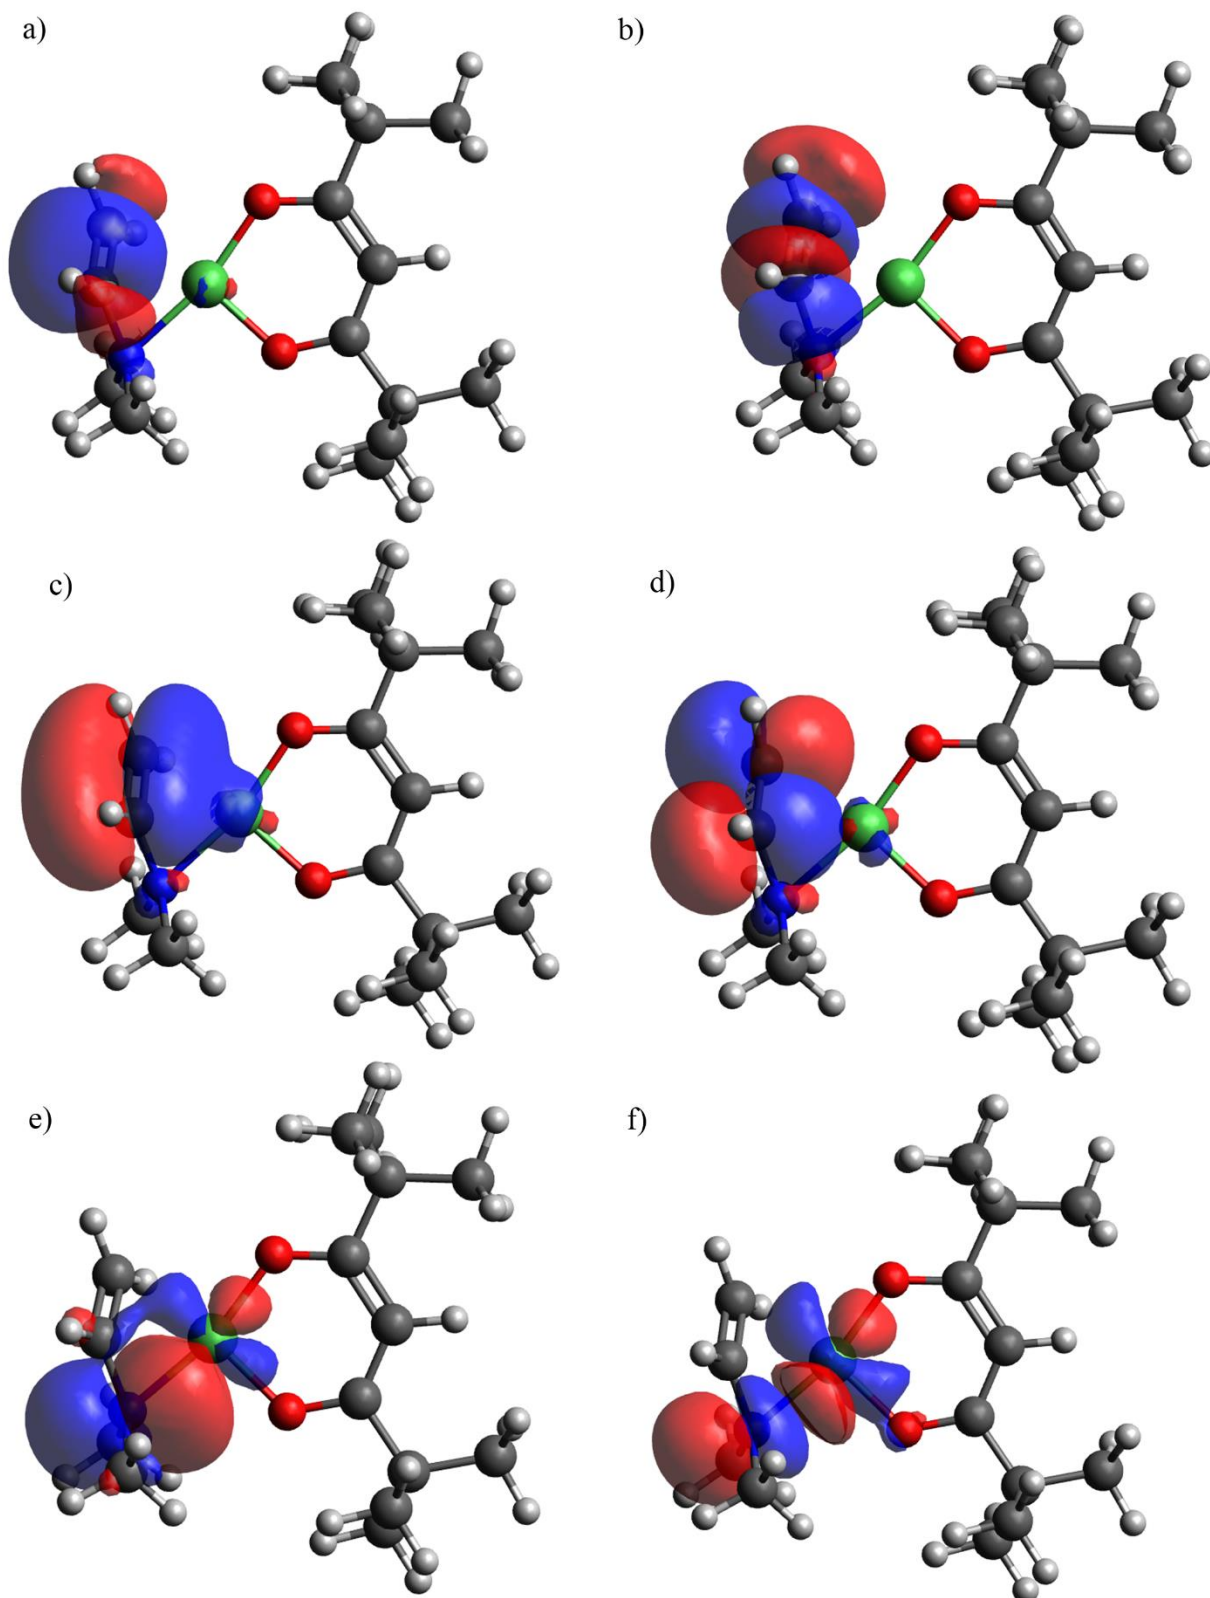

**Figure S8.** Graphical representation of natural bond orbitals of Ni(thd)TMEDA<sup>+</sup>-NH(CH<sub>3</sub>)<sub>2</sub> localized on the following bonds: a) CHT-CH<sub>2</sub>T (BD); b) CHT-CH<sub>2</sub>T (BD\*); c) CHT-CH<sub>2</sub>T (BD); d) CHT-CH<sub>2</sub>T (BD\*); e) Ni-N1 (BD); f) Ni-N1 (BD\*) (see also Table S3). Atom color codes: green = Ni; blue = N; red = O; grey = C; white = H.

| Fragment                                                                                              | NBO type         | Bond            | Occupancy | % Y | % X |
|-------------------------------------------------------------------------------------------------------|------------------|-----------------|-----------|-----|-----|
| <b>Ni(tfa)TMEDA<sup>+</sup></b><br><b>-CH<sub>3</sub>CH<sub>2</sub>N(CH<sub>3</sub>)<sub>2</sub></b>  |                  |                 |           |     |     |
|                                                                                                       | BD ( $\pi$ )     | <i>CHT-CH2T</i> | 1.987     | 52  | 48  |
|                                                                                                       | LP ( $\pi$ )     | <i>CHT</i>      | 0.916     | -   | -   |
|                                                                                                       | LP ( $\pi$ )     | <i>CH2T</i>     | 0.914     | -   | -   |
|                                                                                                       | BD ( $\sigma$ )  | <i>Ni-N1</i>    | 1.836     | 14  | 86  |
|                                                                                                       |                  |                 |           |     |     |
|                                                                                                       | BD* ( $\pi$ )    | <i>CHT-CH2T</i> | 0.010     | 48  | 52  |
|                                                                                                       | BD* ( $\sigma$ ) | <i>Ni-N1</i>    | 0.197     | 86  | 14  |
| <b>Ni(fod)TMEDA<sup>+</sup></b><br><b>- CH<sub>3</sub>CH<sub>2</sub>N(CH<sub>3</sub>)<sub>2</sub></b> |                  |                 |           |     |     |
|                                                                                                       | BD ( $\pi$ )     | <i>CHT-CH2T</i> | 1.987     | 52  | 48  |
|                                                                                                       | LP ( $\pi$ )     | <i>CHT</i>      | 0.920     | -   | -   |
|                                                                                                       | LP ( $\pi$ )     | <i>CH2T</i>     | 0.914     | -   | -   |
|                                                                                                       | BD ( $\sigma$ )  | <i>Ni-N1</i>    | 1.838     | 14  | 86  |
|                                                                                                       |                  |                 |           |     |     |
|                                                                                                       | BD* ( $\pi$ )    | <i>CHT-CH2T</i> | 0.010     | 48  | 52  |
|                                                                                                       | BD* ( $\sigma$ ) | <i>Ni-N1</i>    | 0.197     | 86  | 14  |

**Table S4.** NBO analysis for [Ni(L)TMEDA]<sup>+</sup>-CH<sub>3</sub>CH<sub>2</sub>N(CH<sub>3</sub>)<sub>2</sub>, where L = tfa and fod. The table shows the NBO type, the atoms on which NBOs are localized, NBO occupancy and the percentage localization of NBOs on the involved atoms. Legend: BD = bonding; BD\* = anti-bonding; LP = lone-pair; Y = Ni or CHT; X = N1 or CH2T. Atoms labels as in Figure 4.

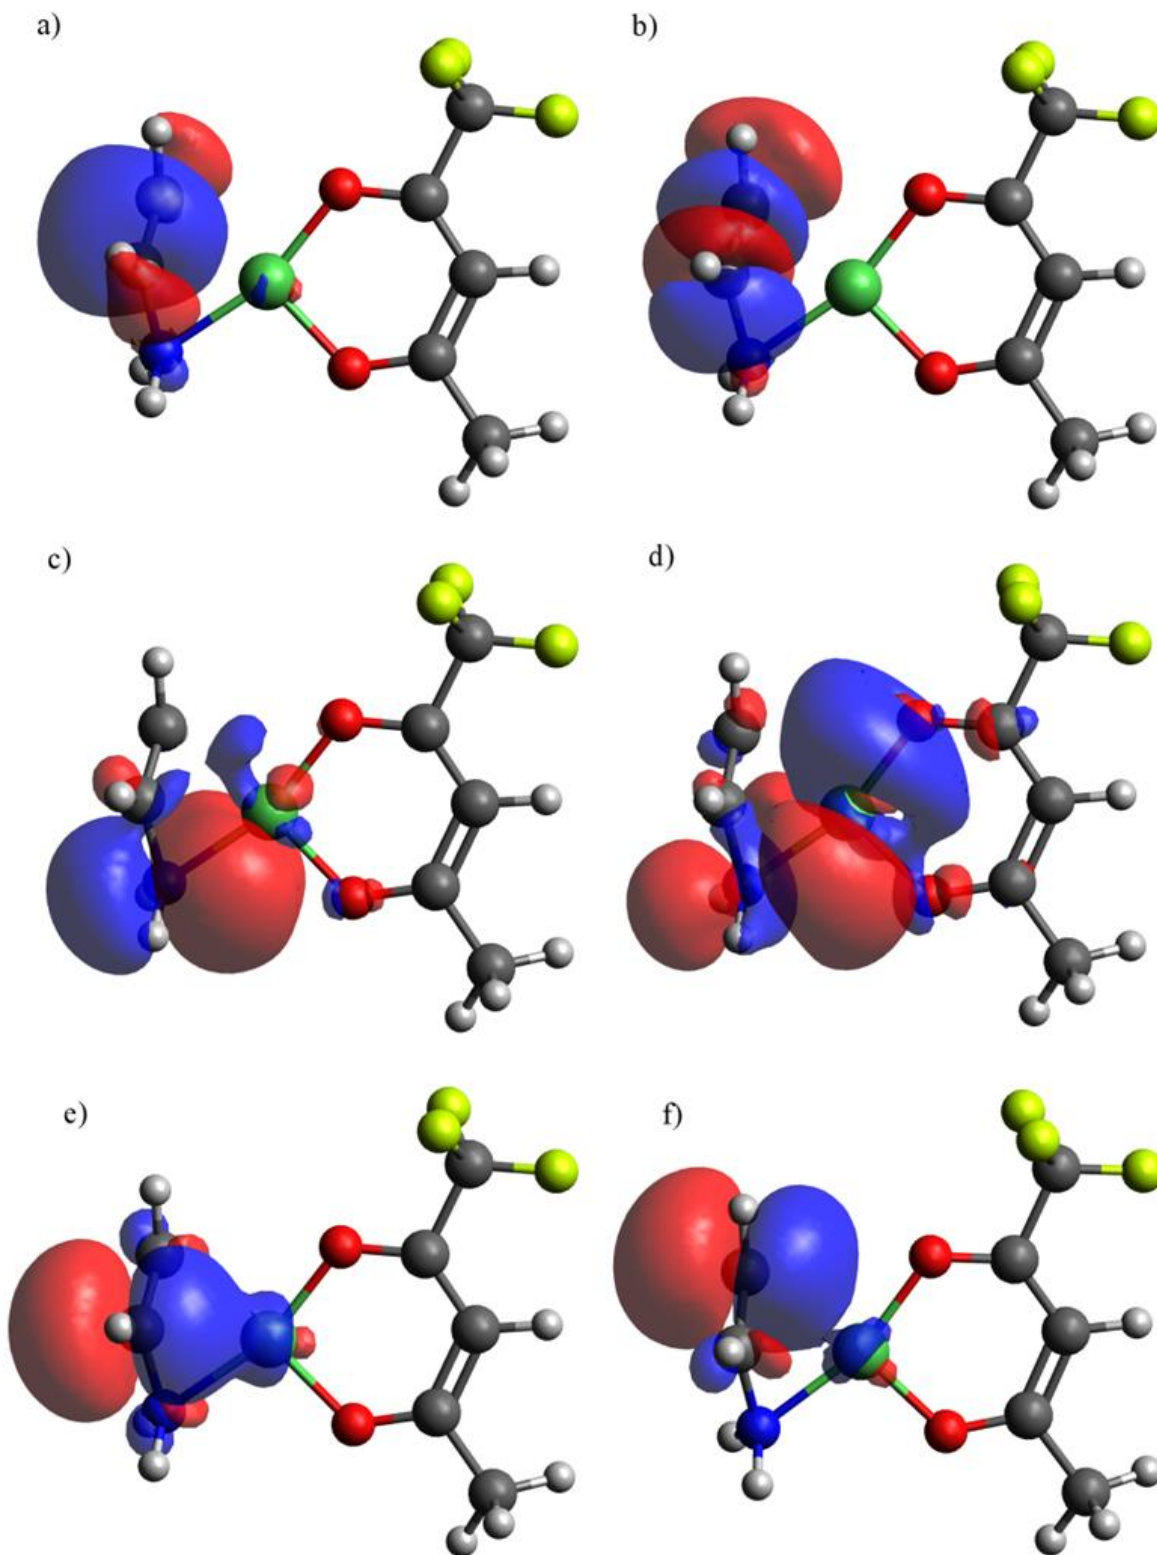

**Figure S9.** Graphical representation of natural bond orbitals of Ni(tfa)TMEDA<sup>+</sup>-CH<sub>3</sub>CH<sub>2</sub>N(CH<sub>3</sub>)<sub>2</sub> localized on the following bonds: a) CHT-CH<sub>2</sub>T (BD); b) CHT-CH<sub>2</sub>T (BD\*); c) Ni-N1 (BD); d) Ni-N1 (BD\*); e) CHT (LP); f) CH<sub>2</sub>T (LP) (see also Table S4). Atom color codes: green = Ni; yellow = F; blue = N; red = O; grey = C; white = H.

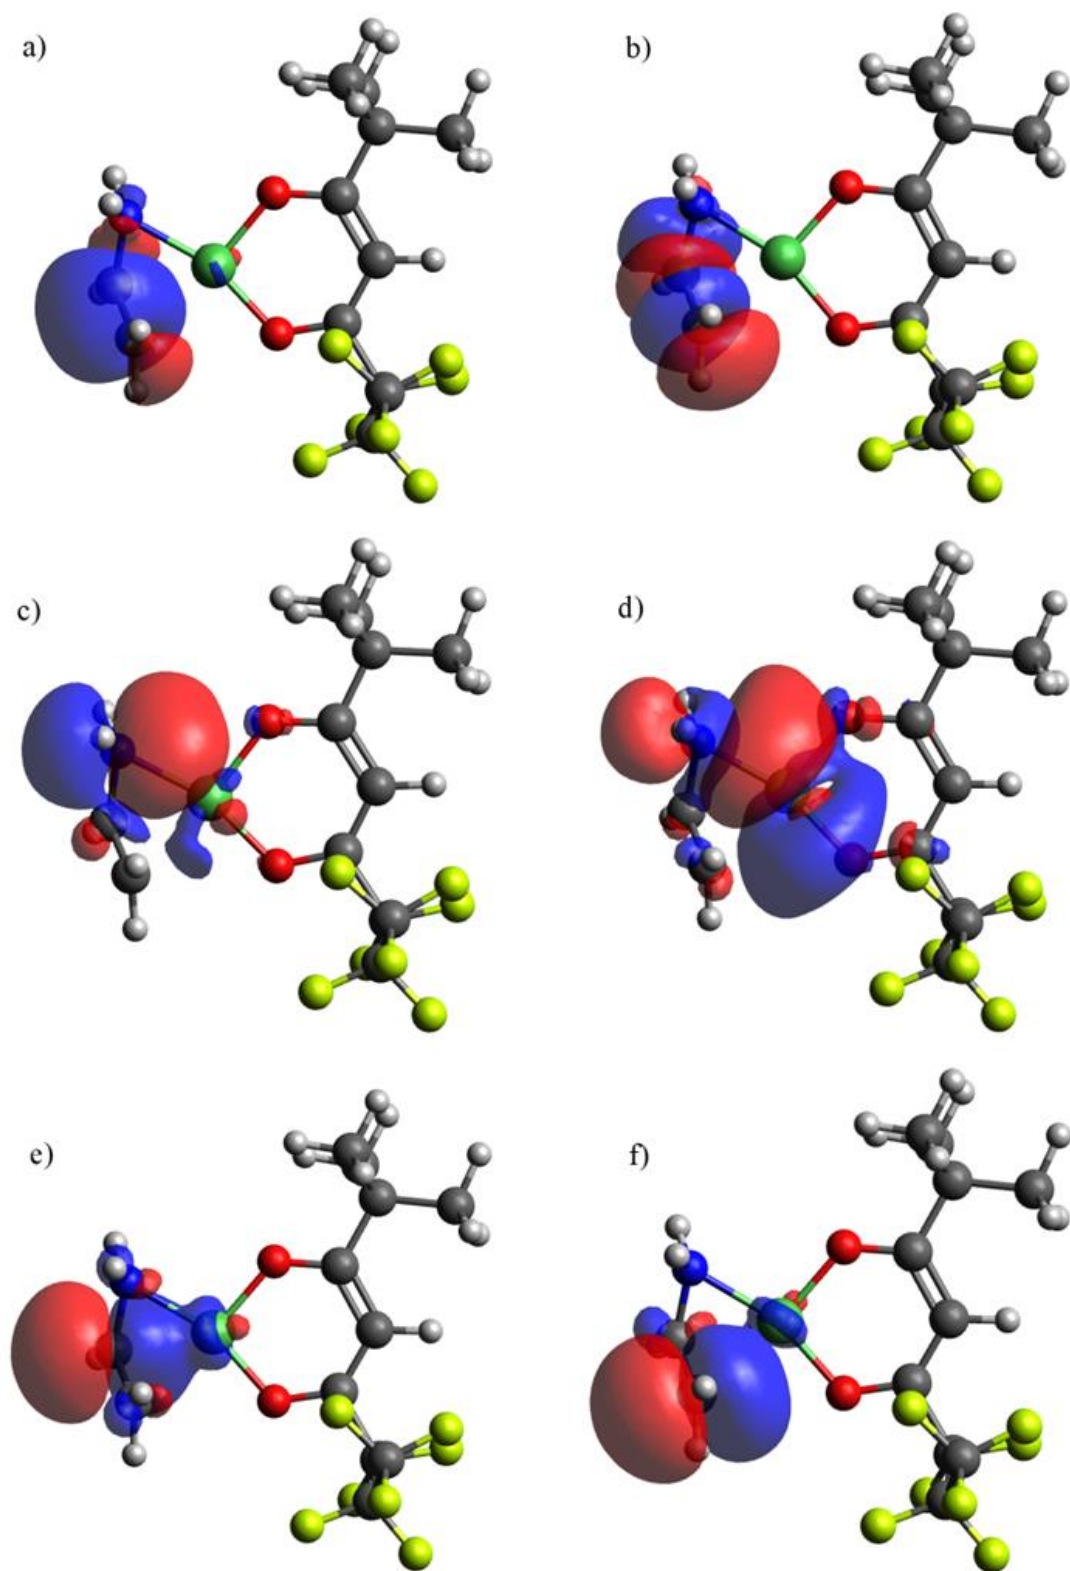

**Figure S10.** Graphical representation of natural bond orbitals of Ni(fod)TMEDA<sup>+</sup>-CH<sub>3</sub>CH<sub>2</sub>N(CH<sub>3</sub>)<sub>2</sub> localized on the following bonds: a) CHT-CH<sub>2</sub>T (BD); b) CHT-CH<sub>2</sub>T (BD\*); c) Ni-N1 (BD); d) Ni-N1 (BD\*); e) CHT (LP); f) CH<sub>2</sub>T (LP) (see also Table S4). Atom color codes: green = Ni; yellow = F; blue = N; red = O; grey = C; white = H.

| Atom              | Ni(tfa) <sub>2</sub> TMEDA | Ni(fod) <sub>2</sub> TMEDA | Ni(thd) <sub>2</sub> TMEDA |
|-------------------|----------------------------|----------------------------|----------------------------|
| Ni                | +1.33                      | +1.33                      | +1.33                      |
| O1                | -1.19                      | -1.18                      | -1.21                      |
| O2                | -1.20                      | -1.19                      | -1.21                      |
| O3                | -1.20                      | -1.20                      | -1.19                      |
| O4                | -1.19                      | -1.18                      | -1.21                      |
| N1                | -1.03                      | -1.03                      | -1.04                      |
| N2                | -1.05                      | -1.05                      | -1.04                      |
| C5                | +0.81                      | +0.81                      | +0.78                      |
| C6                | +0.82                      | +0.77                      | +0.77                      |
| C7                | +0.86                      | +0.84                      | +0.78                      |
| C8                | +0.86                      | +0.85                      | +0.78                      |
| CH1               | -0.01                      | -0.03                      | -0.07                      |
| CH2               | -0.03                      | 0.00                       | -0.05                      |
| CHT               | +0.27                      | +0.25                      | +0.28                      |
| CH <sub>2</sub> T | +0.31                      | +0.28                      | +0.28                      |

**Table S5.** Bader charges for [Ni(L)<sub>2</sub>TMEDA], where L = tfa, fod, thd. Atom labels as in Figure 3.

| Atom              | [Ni(tfa)TMEDA] <sup>+</sup> | [Ni(fod)TMEDA] <sup>+</sup> | [Ni(thd)TMEDA] <sup>+</sup> |
|-------------------|-----------------------------|-----------------------------|-----------------------------|
| Ni                | +0.99                       | +1.00                       | +1.00                       |
| O1                | -1.14                       | -1.16                       | -1.16                       |
| O2                | -1.14                       | -1.17                       | -1.17                       |
| N1                | -1.03                       | -1.01                       | -1.01                       |
| N2                | -1.01                       | -1.03                       | -1.03                       |
| C5                | +0.71                       | +0.67                       | +0.67                       |
| C7                | +0.72                       | +0.65                       | +0.65                       |
| CH1               | +0.10                       | +0.08                       | +0.08                       |
| CHT               | +0.28                       | +0.27                       | +0.27                       |
| CH <sub>2</sub> T | +0.28                       | +0.27                       | +0.27                       |

**Table S6.** Bader charges for [Ni(L)TMEDA]<sup>+</sup>, where L = tfa, fod, thd. Atom labels as in Figure 3.

| Atom              | [Ni(tfa)TMEDA] <sup>+</sup> -<br>NH(CH <sub>3</sub> ) <sub>2</sub> | [Ni(fod)TMEDA] <sup>+</sup> -<br>NH(CH <sub>3</sub> ) <sub>2</sub> | [Ni(thd)TMEDA] <sup>+</sup> -<br>NH(CH <sub>3</sub> ) <sub>2</sub> |
|-------------------|--------------------------------------------------------------------|--------------------------------------------------------------------|--------------------------------------------------------------------|
| Ni                | +0.95                                                              | +0.95                                                              | +0.95                                                              |
| O1                | -1.12                                                              | -1.13                                                              | -1.13                                                              |
| O2                | -1.17                                                              | -1.12                                                              | -1.12                                                              |
| N                 | -1.09                                                              | -1.10                                                              | -1.10                                                              |
| C5                | +0.70                                                              | +0.67                                                              | +0.67                                                              |
| C7                | +0.72                                                              | +0.71                                                              | +0.71                                                              |
| CH1               | +0.09                                                              | +0.09                                                              | +0.09                                                              |
| CHT               | +0.22                                                              | +0.21                                                              | +0.21                                                              |
| CH <sub>2</sub> T | -0.05                                                              | -0.08                                                              | -0.08                                                              |

**Table S7.** Bader charges for [Ni(L)TMEDA]<sup>+</sup> -NH(CH<sub>3</sub>)<sub>2</sub>, where L = tfa, fod, thd. Atom labels as in Figure 4. N indicates the nitrogen atom bound to Ni.

| Atom              | [Ni(tfa)TMEDA] <sup>+</sup> -<br>CH <sub>3</sub> CH <sub>2</sub> N(CH <sub>3</sub> ) <sub>2</sub> | [Ni(fod)TMEDA] <sup>+</sup> -<br>CH <sub>3</sub> CH <sub>2</sub> N(CH <sub>3</sub> ) <sub>2</sub> | [Ni(fod)TMEDA] <sup>+</sup> -<br>(CH <sub>3</sub> ) <sub>2</sub> C=CH <sub>2</sub> |
|-------------------|---------------------------------------------------------------------------------------------------|---------------------------------------------------------------------------------------------------|------------------------------------------------------------------------------------|
| Ni                | +0.97                                                                                             | +0.97                                                                                             | +1.00                                                                              |
| O1                | -1.11                                                                                             | -1.09                                                                                             | -1.12                                                                              |
| O2                | -1.12                                                                                             | -1.13                                                                                             | -1.14                                                                              |
| N                 | -1.15                                                                                             | -1.14                                                                                             | -1.01                                                                              |
| C5                | +0.68                                                                                             | +0.68                                                                                             | +0.76                                                                              |
| C7                | +0.72                                                                                             | +0.69                                                                                             | +0.77                                                                              |
| CH1               | +0.09                                                                                             | +0.08                                                                                             | +0.07                                                                              |
| CHT               | +0.21                                                                                             | +0.19                                                                                             | +0.27                                                                              |
| CH <sub>2</sub> T | -0.06                                                                                             | -0.05                                                                                             | +0.24                                                                              |

**Table S8.** Bader charges for [Ni(L)TMEDA]<sup>+</sup> - CH<sub>3</sub>CH<sub>2</sub>N(CH<sub>3</sub>)<sub>2</sub>, where L = tfa, fod, and for [Ni(fod)TMEDA]<sup>+</sup> - (CH<sub>3</sub>)<sub>2</sub>C=CH<sub>2</sub>. Atom labels as in Figure 4. In each case, N indicates the nitrogen atom(s) bound to Ni (for [Ni(fod)TMEDA]<sup>+</sup> - (CH<sub>3</sub>)<sub>2</sub>C=CH<sub>2</sub>, both N atoms are ligated to Ni and bear identical Bader charges).
